# Supplementary material for: Predicting Lymph Node Metastasis Status from Primary Muscle-Invasive Bladder Cancer Histology Slides Using Deep Learning: A Retrospective Multicenter Study
Source: MDPI journal article supplement (doi:10.3390/cancers15113000), 2023-05-31
Supplement: s1 [file s1]

# Supplementary Materials: Predicting Lymph Node Metastasis Status from Primary Muscle-Invasive Bladder Cancer Histology Slides Using Deep Learning: A Retrospective Multicenter Study

Qingyuan Zheng, Jun Jian, Jingsong Wang, Kai Wang, Junjie Fan, Huazhen Xu, Xinmiao Ni, Song Yang, Jingping Yuan, Jiejun Wu, Panpan Jiao, Rui Yang, Zhiyuan Chen, Xiuheng Liu and Lei Wang

Table S1. Dataset distribution of patients and corresponding images in the predictor (SBLNP).

|             | Patients | Total Images | Positive LNM Images | Negative LNM Images |
|-------------|----------|--------------|---------------------|---------------------|
| TCGA Cohort | 323      | 358          | 116                 | 207                 |
| RHWU Cohort | 139      | 417          | 111                 | 306                 |
| PHHC Cohort | 78       | 230          | 79                  | 151                 |

Table S2. Dataset distribution of images in the training, internal validation, and external validation sets.

|       | TCGA Cohort  |                         | RHWU Cohort             | PHHC Cohort             |
|-------|--------------|-------------------------|-------------------------|-------------------------|
|       | Training set | Internal validation set | External validation set | External validation set |
| SBLNP | 286          | 72                      | 417                     | 230                     |
